# Supplementary material for: DFT study on CO2 capture using boron, nitrogen, and phosphorus-doped C20 in the presence of an electric field
Source: Springer Nature journal article supplement (doi:10.1038/s41598-024-62301-x), 2024-05-29
Supplement: 41598_2024_62301_MOESM1_ESM.pdf [file 41598_2024_62301_MOESM1_ESM.pdf]

# Supporting Information for: CO<sub>2</sub> capture using boron, nitrogen, and phosphorus-doped C<sub>20</sub> in the present electric field: DFT study

Parham Rezaee,<sup>\*,†,‡</sup> Shervin Alikhah Asl,<sup>¶</sup> Mohammad Hasan Javadi,<sup>§</sup> Shahab Rezaee,<sup>‡</sup> Razieh Morad,<sup>†</sup> Mahmood Akbari,<sup>\*,†</sup> Seyed Shahriar Arab,<sup>||</sup> and Malik Maaza<sup>†</sup>

<sup>†</sup>*UNESCO-UNISA-iTLABS Africa Chair in Nanoscience and Nanotechnology (U2ACN2), College of Graduate Studies, University of South Africa (UNISA), Pretoria, South Africa*

<sup>‡</sup>*Department of Biophysics, School of Biological Sciences, Tarbiat Modares University, Tehran, Iran*

<sup>¶</sup>*Unit 12, 3<sup>rd</sup> Floor, Sahel Apartment, Motahhari St., Ardabil, Iran*

<sup>§</sup>*Unit 1, NO. 17, Keyhan 2 Aly., Keyhan St., Ayatollah Kashani boulevard, Tehran, Iran*

<sup>||</sup>*Department of Pediatrics, University of California, San Diego, La Jolla, CA 92093, USA*

E-mail: parham.rezaee@modares.ac.ir; makbari@tlabs.ac.za

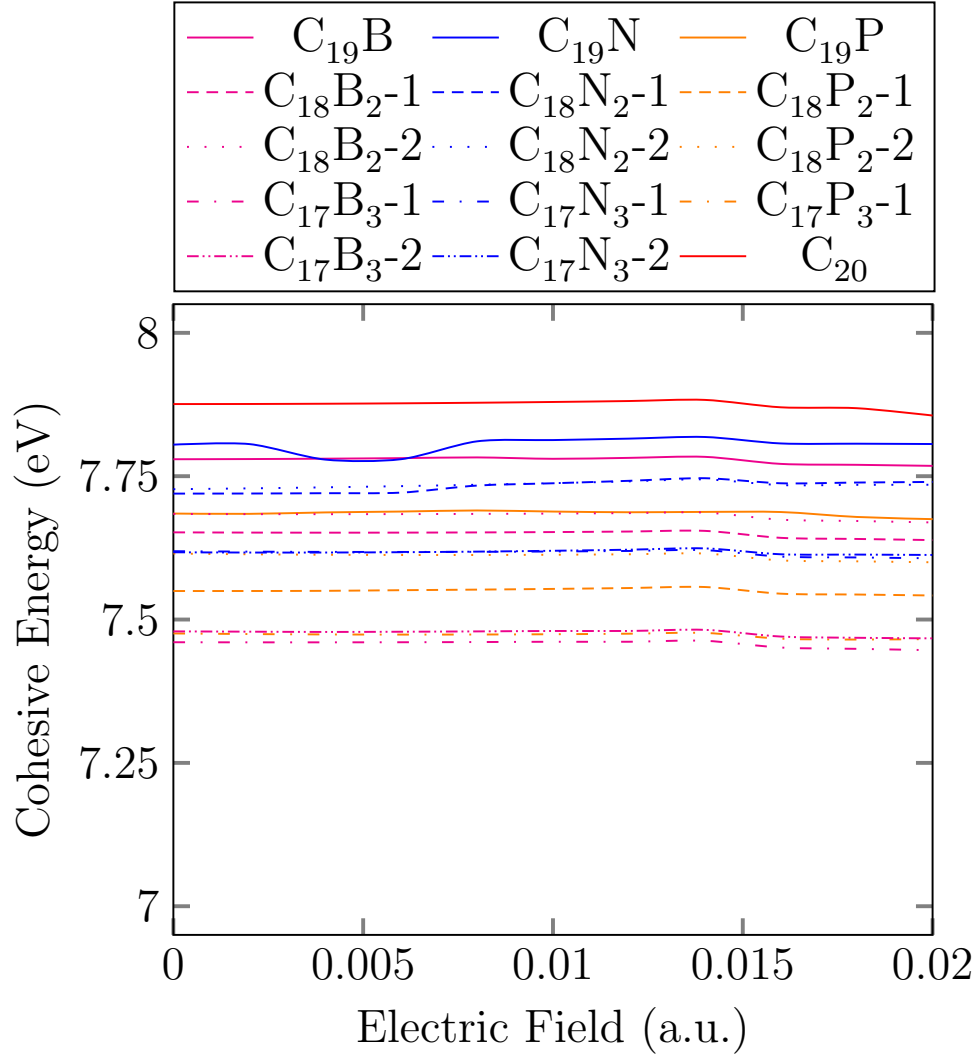

Figure S1: Variation of cohesive energy for  $C_{20}$  and  $C_{20-n}X_n$  ( $n=1, 2, \text{ and } 3$ ;  $X= B, N, \text{ and } P$ ) in 0–0.02 *a.u.* electric field.

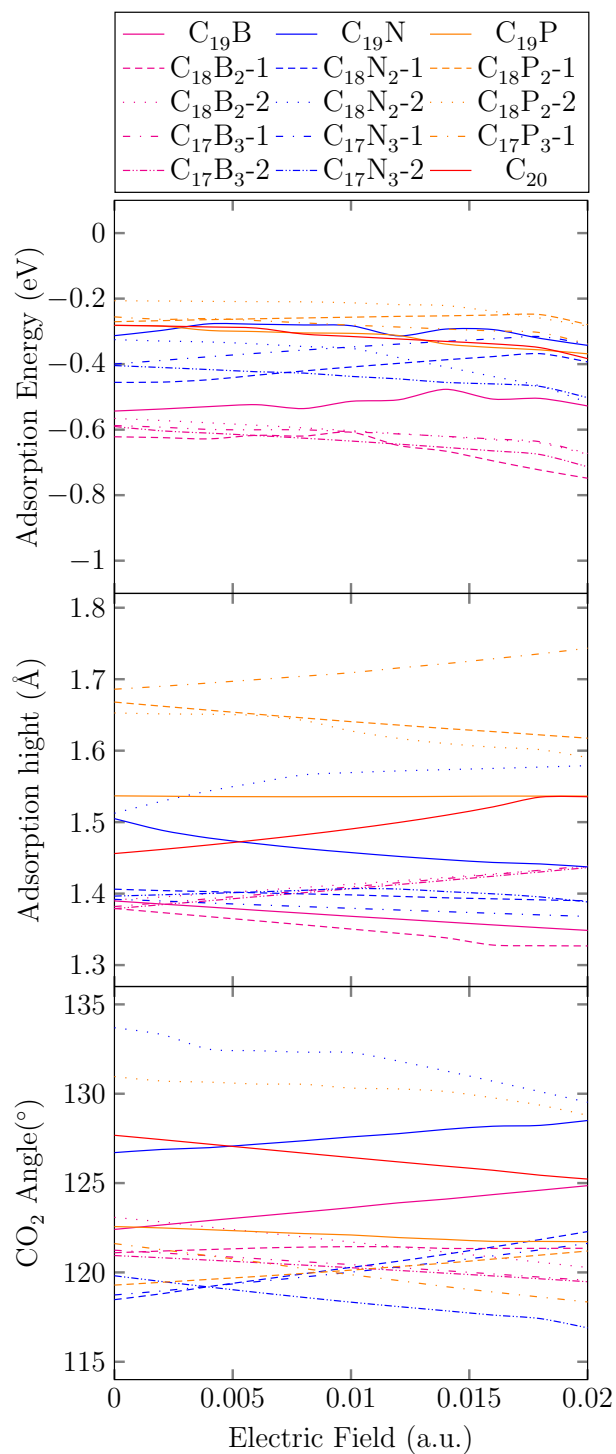

Figure S2: Variation of (a) adsorption energy (eV) (b) adsorption height (Å) (c) CO<sub>2</sub> angle (°) for C<sub>20</sub> and C<sub>20-n</sub>X<sub>n</sub> (n=1, 2, and 3; X=B, N, and P) in 0 – 0.02 *a.u.* electric field.
